# Supplementary material
Source: publisher figshare collection journal article supplement (https://asha.figshare.com/ndownloader/files/26510831)
Supplement: Supplementary file 1 [file 26510831]

## **Supplemental Material S1. Time-ordered session treatment plan.**

- 1) Delayed Memory Activity (10 minutes)
  - \*Units of information, how many and moving from related to unrelated (semantic distance)
  - \*Time for delay (moving from baseline time to longer as improvement occurs; using a timer)
  - \*Training on Compensatory Strategies: visualizing, re-auditorization, semantic connections/chunking, story connections, acronyms
- 2) ISMT (25 minutes)
  - \*Set of 3 targets, 1 at a time, level/semantic distance based on assessment results
  - \*On a white board, or large pad of paper
  - \*Interactive but participant driven with cues as needed
  - \*Words verbally listed out by participant for each target
  - \*After all 3 words semantic feature analysis completed, connections are created/seen/discussed/added
  - \*Cueing occurred when participant unable to see connections, or generate semantic information
  - \*Clarification also if participant made odd/unexpected connections, however if participant rationale clarifies even abstract relationships, this was encouraged
  - \*Second set of 3 targets if time allows
- 3) Traditional Short-Term memory/Working Memory tasks (20 minutes)
  - \*All while using at least 1 strategy
  - \*Recall of short list of words and identify target
  - \*Recall list of numbers and sequencing them
  - \*Recall of short paragraphs like new stories, articles
  - \*Structured short conversation recall
- 4) Delayed Memory Recall from #1 (5 minutes)
  - \*Cueing as needed
